# Supplementary material for: Magnetic field fluctuation properties of coronal mass ejection-driven sheath regions in the near-Earth solar wind
Source: Copernicus journal article supplement (doi:10.5194/angeo-38-999-2020), 2020-09-16
Supplement: Supplementary file 1 [file angeo-38-999-2020-supplement.pdf]

Supplement of Ann. Geophys., 38, 999–1017, 2020  
<https://doi.org/10.5194/angeo-38-999-2020-supplement>  
© Author(s) 2020. This work is distributed under  
the Creative Commons Attribution 4.0 License.

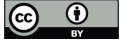

*Supplement of*

## **Magnetic field fluctuation properties of coronal mass ejection-driven sheath regions in the near-Earth solar wind**

**Emilia K. J. Kilpua et al.**

*Correspondence to:* Emilia K. J. Kilpua ([emilia.kilpua@helsinki.fi](mailto:emilia.kilpua@helsinki.fi))

The copyright of individual parts of the supplement might differ from the CC BY 4.0 License.

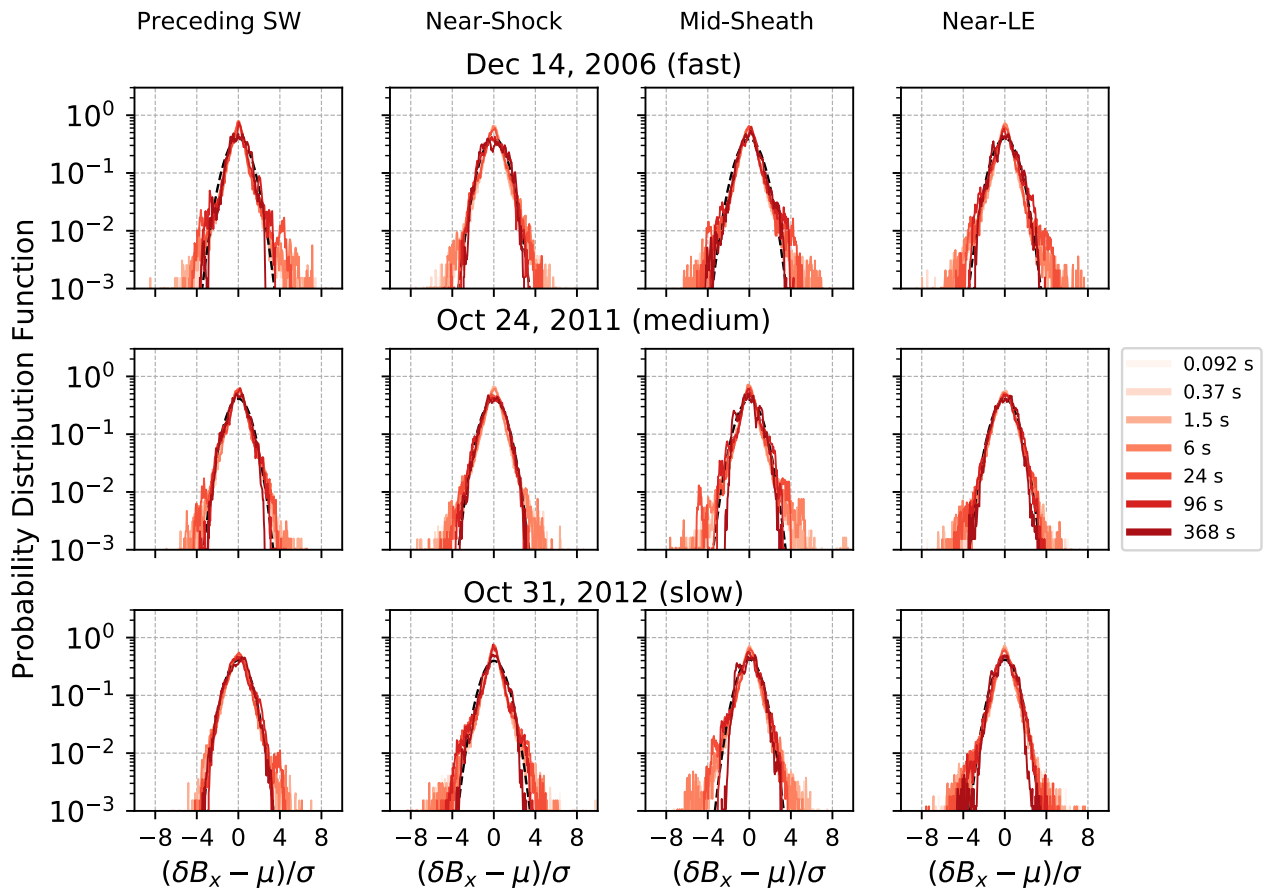

**Figure S1.** Probability distribution functions of for the magnetic field y-component in a similar format as Figure 4.

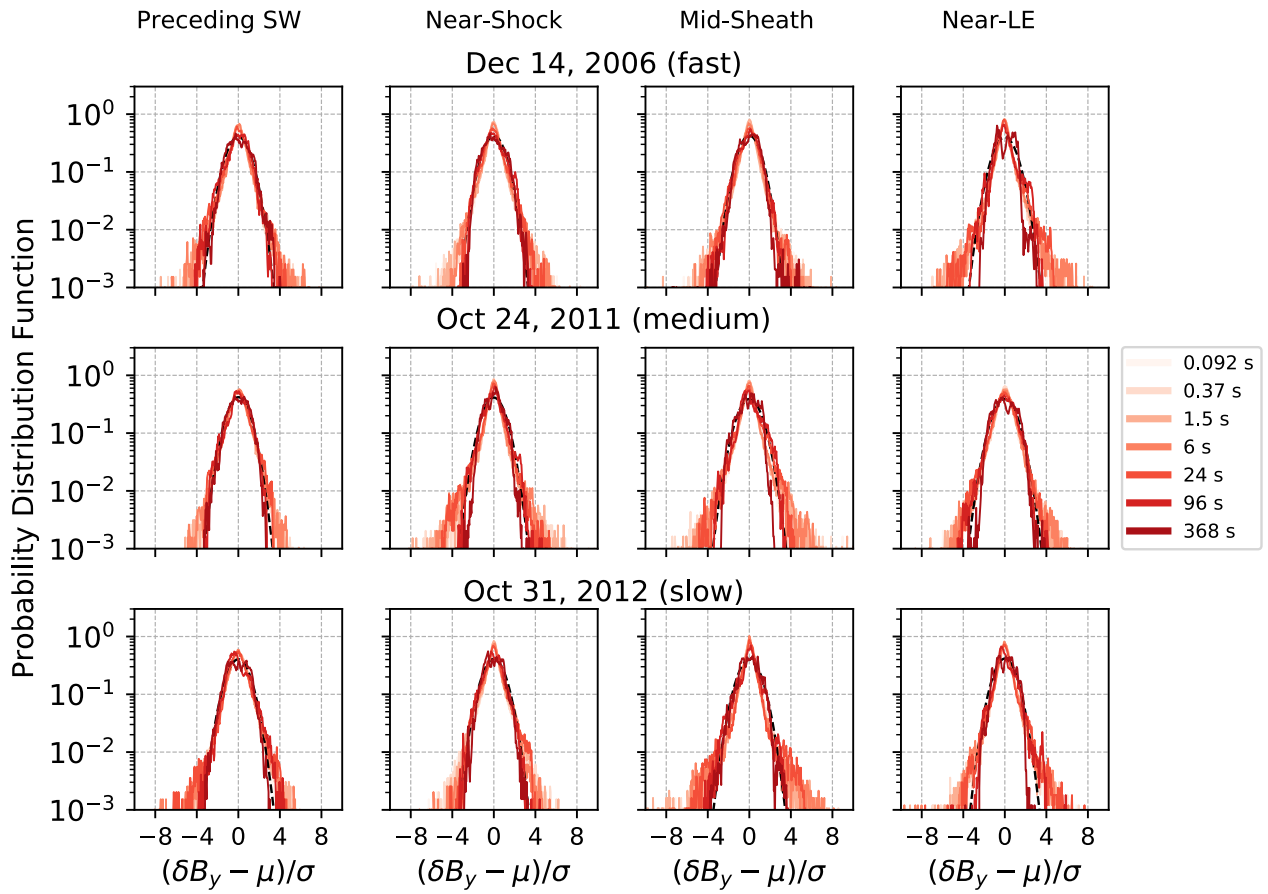

**Figure S2.** Probability distribution functions of for the magnetic field  $y$ -component in a similar format as Figure 4.
